# Supplementary material for: Developing the Svalbard Integrated Arctic Earth Observing System (SIOS)
Source: Copernicus journal article supplement (doi:10.5194/esd-15-933-2024), 2024-07-30
Supplement: Supplementary file 1 [file esd-15-933-2024-supplement.pdf]

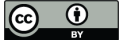

*Supplement of*

## **Developing the Svalbard Integrated Arctic Earth Observing System (SIOS)**

**Hanne H. Christiansen et al.**

*Correspondence to:* Hanne H. Christiansen ([hannec@unis.no](mailto:hannec@unis.no))

The copyright of individual parts of the supplement might differ from the article licence.

## Supplementary information

**Table S1. Table of names, acronyms, countries and homepages of the 28 SIOS institutions**

| <b>Institution full name</b>                                                      | <b>Acronym</b> | <b>Country</b> | <b>Website</b>                                                                                                                                                              |
|-----------------------------------------------------------------------------------|----------------|----------------|-----------------------------------------------------------------------------------------------------------------------------------------------------------------------------|
| Alfred Wegener Institute, Helmholtz centre for polar and marine research          | AWI            | Germany        | <a href="https://www.awi.de/">https://www.awi.de/</a>                                                                                                                       |
| Andøya Space                                                                      | ASP            | Norway         | <a href="https://www.andoyaspace.no/">https://www.andoyaspace.no/</a>                                                                                                       |
| Geological Survey of Norway                                                       | NGU            | Norway         | <a href="http://www.ngu.no/en/">http://www.ngu.no/en/</a>                                                                                                                   |
| Institute for Atmospheric and Earth System Research of the University of Helsinki | INAR           | Finland        | <a href="https://www.helsinki.fi/en/institute-for-atmospheric-and-earth-system-research">https://www.helsinki.fi/en/institute-for-atmospheric-and-earth-system-research</a> |
| Institute of Geophysics, Polish Academy of Sciences                               | IG PAS         | Poland         | <a href="http://www.igf.edu.pl/home.php">http://www.igf.edu.pl/home.php</a>                                                                                                 |
| Institute of Marine Research                                                      | IMR            | Norway         | <a href="http://www.imr.no/en">http://www.imr.no/en</a>                                                                                                                     |
| Korea Polar Research Institute                                                    | KOPRI          | Rep. of Korea  | <a href="https://eng.kopri.re.kr/">https://eng.kopri.re.kr/</a>                                                                                                             |
| NILU                                                                              | NILU           | Norway         | <a href="https://www.nilu.no/">https://www.nilu.no/</a>                                                                                                                     |
| Norwegian Research Centre AS                                                      | NORCE          | Norway         | <a href="https://www.norceresearch.no/en/">https://www.norceresearch.no/en/</a>                                                                                             |
| NORSAR                                                                            | NORSAR         | Norway         | <a href="https://www.norsar.no/home/">https://www.norsar.no/home/</a>                                                                                                       |
| Norwegian University of Science and Technology                                    | NTNU           | Norway         | <a href="https://www.ntnu.edu/">https://www.ntnu.edu/</a>                                                                                                                   |
| Nansen Environmental and Remote Sensing Center                                    | NERSC          | Norway         | <a href="https://www.nersc.no/">https://www.nersc.no/</a>                                                                                                                   |
| National Centre for Polar and Ocean Research                                      | NCPOR          | India          | <a href="http://www.ncaor.gov.in/">http://www.ncaor.gov.in/</a>                                                                                                             |
| National Institute for Polar Research                                             | NIPR           | Japan          | <a href="http://www.nipr.ac.jp/english/">http://www.nipr.ac.jp/english/</a>                                                                                                 |
| National Research Council of Italy                                                | CNR            | Italy          | <a href="https://www.cnr.it/en">https://www.cnr.it/en</a>                                                                                                                   |
| Norwegian Institute for Nature Research                                           | NINA           | Norway         | <a href="https://www.nina.no/">https://www.nina.no/</a>                                                                                                                     |
| Norwegian Institute for Water Research                                            | NIVA           | Norway         | <a href="https://www.niva.no/en">https://www.niva.no/en</a>                                                                                                                 |
| Norwegian Meteorological Institute                                                | MET Norway     | Norway         | <a href="https://www.met.no/en">https://www.met.no/en</a>                                                                                                                   |
| Norwegian Polar Institute                                                         | NPI            | Norway         | <a href="http://www.npolar.no/en/">http://www.npolar.no/en/</a>                                                                                                             |
| Norwegian Water Resources and Energy Directorate                                  | NVE            | Norway         | <a href="https://www.nve.no/english/">https://www.nve.no/english/</a>                                                                                                       |
| Swedish Polar Research Secretariat                                                | SPRS           | Sweden         | <a href="https://polar.se/en/">https://polar.se/en/</a>                                                                                                                     |
| The Norwegian Geotechnical Institute                                              | NGI            | Norway         | <a href="https://www.ngi.no/">https://www.ngi.no/</a>                                                                                                                       |
| The University Centre in Svalbard                                                 | UNIS           | Norway         | <a href="https://www.unis.no/">https://www.unis.no/</a>                                                                                                                     |
| The Arctic University of Norway                                                   | UiT            | Norway         | <a href="https://en.uit.no/">https://en.uit.no/</a>                                                                                                                         |
| University of Bergen                                                              | UiB            | Norway         | <a href="http://www.uib.no/en">http://www.uib.no/en</a>                                                                                                                     |
| University of Groningen                                                           | UG             | Netherlands    | <a href="https://www.rug.nl/">https://www.rug.nl/</a>                                                                                                                       |
| University of Oslo                                                                | UiO            | Norway         | <a href="http://www.uio.no/english/">http://www.uio.no/english/</a>                                                                                                         |
| University of Silesia, Poland                                                     | US             | Poland         | <a href="http://english.us.edu.pl/">http://english.us.edu.pl/</a>                                                                                                           |
